# Supplementary material
Source: PubMed Central journal article supplement (PMC3615461)
Supplement: NIHMS382257-supplement-01.pdf [file NIHMS382257-supplement-01.pdf]

## Supplemental Online Information

### Supplemental Figure legends

Figure S1 (related to Figure 1). (A) Mutation of Fap7 produces the same phenotype as deletion of Fap7. (B) Biological repeat of Gal1::Fap7 samples grown for 16h in dextrose. (top) Absorbance profiles at 254 nm for 10-50% sucrose gradients; (middle) Western blots for assembly factors in each fraction; (bottom) Northern blots for rRNAs.

Figure S2 (related to Figure 3). Depletion of eIF5B accumulates Rio2 in 40S particles. (A) BY4741 wild type control; (B) eIF5B::KanMX6 cells. Absorbance profiles at 254 nm for 10-50% sucrose gradients (top), Western blots for assembly factors (middle) and Northern blots for rRNAs and precursors (bottom) are shown. (C) Biological repeat of the experiment in Figure S2B. (D) Biological repeat of the experiment in Figure 3.

Figure S3 (related to Figure 4). (A) Accumulation of 20S rRNA in lysates from strains used herein. (B) Depletion of Rli1 leads to degradation of pre-40S assembly factors.

Figure S4 (related to Figure 4). (A) Biological repeat of the experiment in Figure 4A. (B) Biological repeat of the experiment in Figure 4B.

Figure S5 (related to Figure 5). (A) Biological repeat of the experiment in Figure 5A. (B) Biological repeat of the experiment in Figure 5B.

---

**Table S1: Yeast strains used in this study**

---

| <b>Strain</b> | <b>Description</b>             | <b>Genotype</b>                                       | <b>Reference</b> |
|---------------|--------------------------------|-------------------------------------------------------|------------------|
| YKK87         | Rio2TAP                        | Rio2TAP::HIS3                                         | Open Biosystems  |
| YKK392        | eIF5B $\Delta$                 | Fun12::KanMX6                                         | Open Biosystems  |
| YKK395        | Dom34 $\Delta$                 | Dom34::KanMX6                                         | Open Biosystems  |
| YKK216        | Rio2TAP,Gal1::Fap7             | Rio2TAP::HIS3,<br>GalFap7::NatMX6                     | This work        |
| YKK178        | eIF5B $\Delta$ ,Gal1::Fap7     | Fun12::KanMX6,<br>GalFap7::NatMX6                     | This work        |
| YKK82         | Gal1::Rli1TAP                  | Gal::Rli1TAP::KanMX6,<br>HIS3                         | This work        |
| YKK217        | Gal1::Nob1, Rio2TAP            | Rio2TAP::HIS3,<br>GalNob1::KanMX6                     | This work        |
| YKK398        | Gal1::Nob1, Rio2TAP, Gal::Rli1 | Rio2TAP::HIS3,<br>GalNob1::KanMX6,<br>GalRli1::NatMX6 | This work        |

All strains have the BY4741 background provided by Open Biosystems.

---

**Table S2: Oligonucleotides used in this study.**

---

| #  | name                      | sequence                                                         |
|----|---------------------------|------------------------------------------------------------------|
| 1  | Fap7F2                    | GGAATAGTATATTTTGATTCTTCTTCTTCTCCTGTTTTCCG<br>AATTCGAGCTCGTTTAAAC |
| 2  | Fap7R2                    | TTCCTGTAACAATGATATTCGGTCCATACCGTCTTGTT<br>CATTTTGAGATCCGGGTTTT   |
| 3  | Fap7up                    | CCACTTCGCTTCTGGATGTT                                             |
| 4  | Fap7down                  | CGTCCCGTTTACTTCAATGC                                             |
| 5  | Rli1F4                    | CTGTATTCTTAGATCTTCATTGTGATCTGTTTCAGCGCG<br>A GAATTCGAGCTCGTTAAAC |
| 6  | Rli1R2                    | TATCAGCGCTAACGATAGCGATACGACTGTTTTTATCAC<br>TCATTTTGAGATCCGGGTTTT |
| 7  | Probe 5S                  | CTACTCGGTCAGGCTC                                                 |
| 8  | Probe tRNA <sup>Met</sup> | TCGGTTTCGATCCGAGGACATCAGGGTTATGA                                 |
| 9  | Probe b/20S               | GCTCTCATGCTCTTGCC                                                |
| 10 | Probe 25S                 | GCCCGTTCCCTTGGCTGTG                                              |
| 11 | Probe 18S                 | CATGGCTTAATCTTTGAGAC                                             |
| 12 | Probe U2                  | CAGATACTACACTTG                                                  |
