# Supplementary material
Source: PubMed Central journal article supplement (PMC3615461)

Figure S1

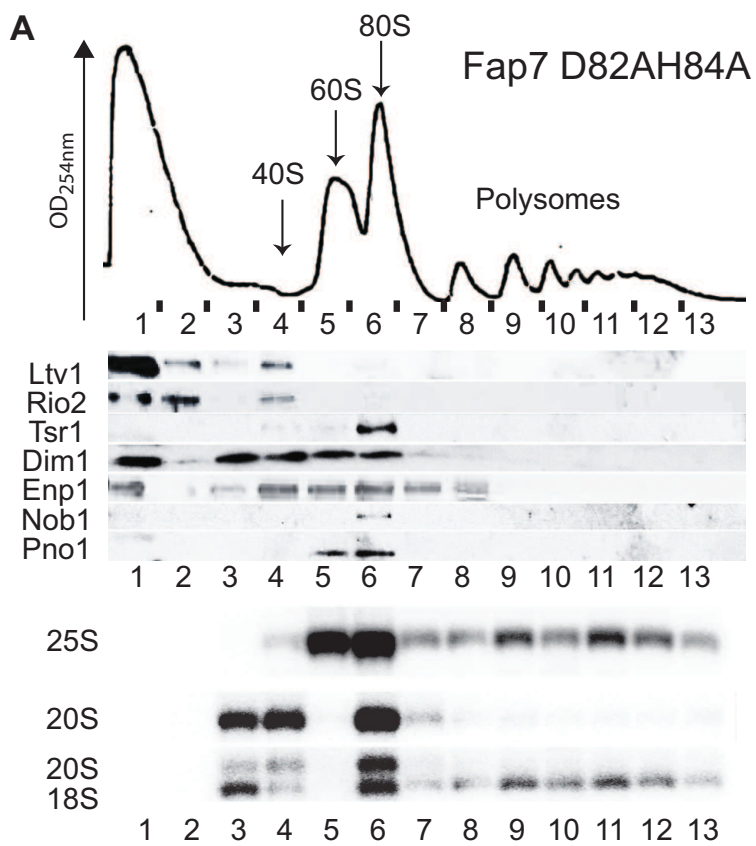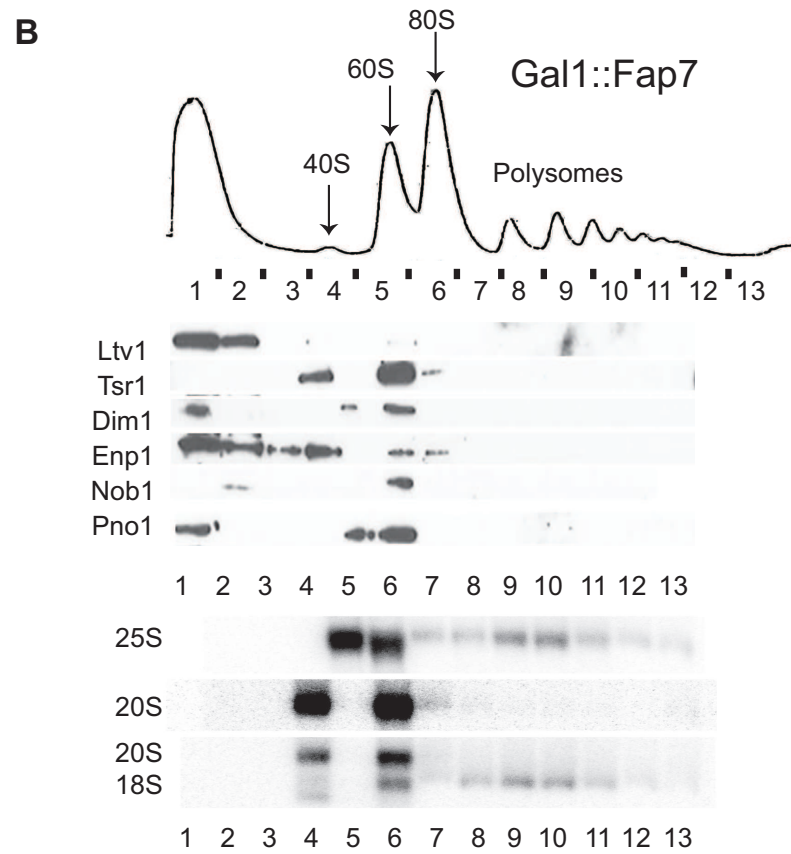

**Figure S2**

**A** BY4741

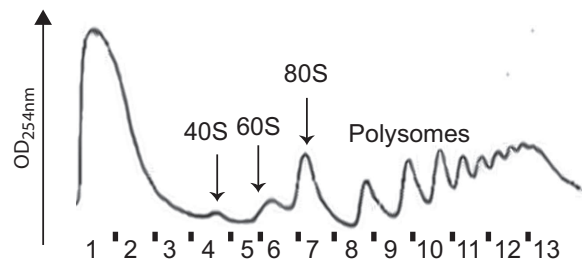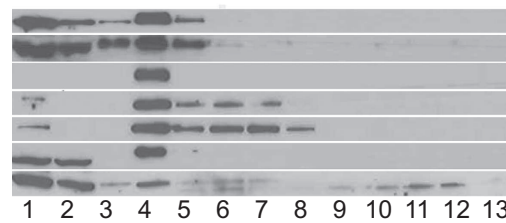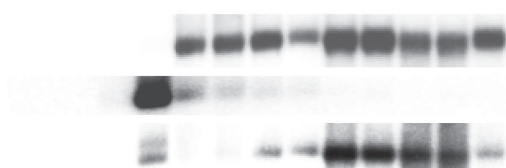

1 2 3 4 5 6 7 8 9 10 11 12 13

**B**  $\Delta$ eIF5B

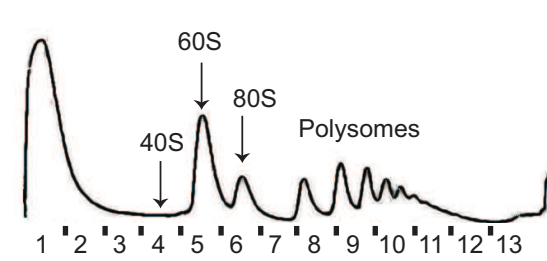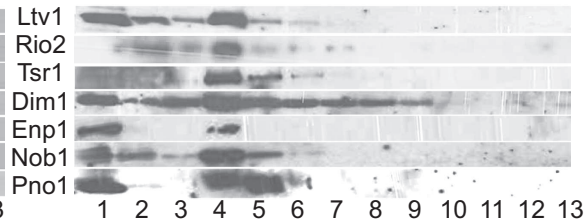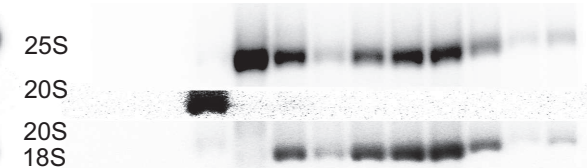

1 2 3 4 5 6 7 8 9 10 11 12 13

**Figure S2**

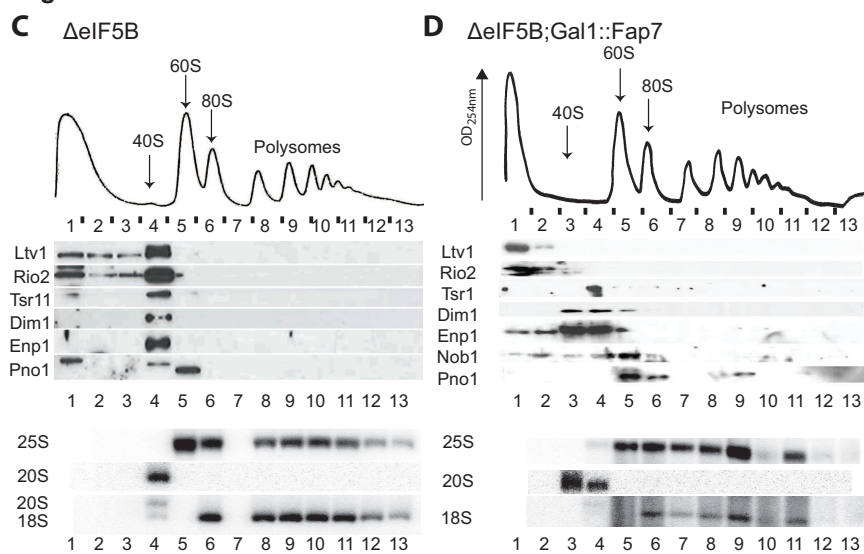

# Figure S3

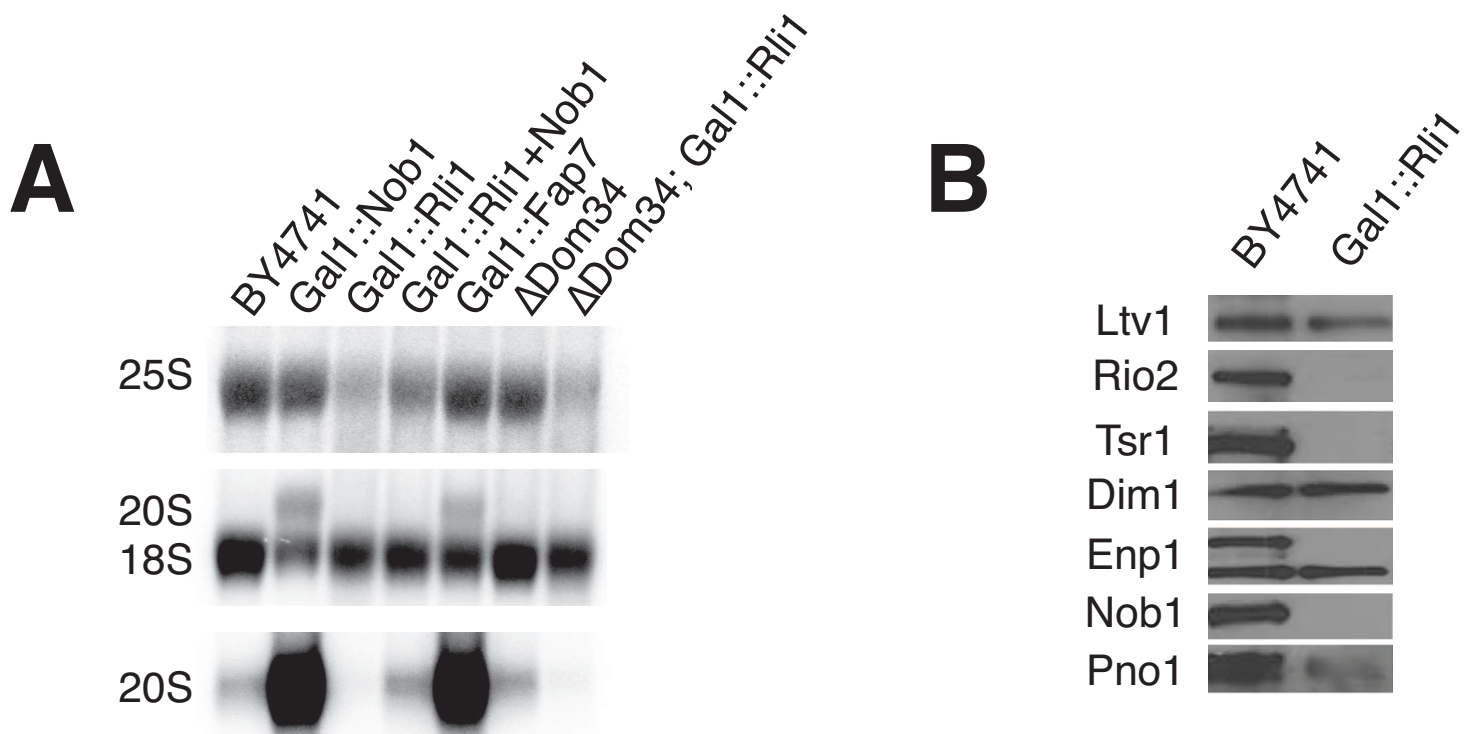

Figure S4

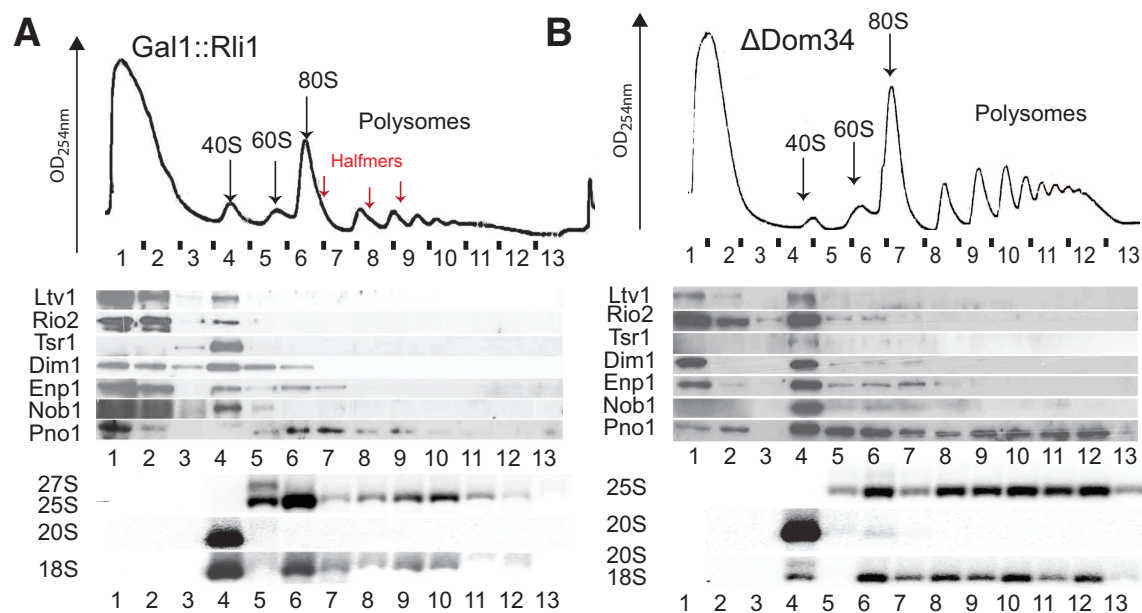

Figure S5

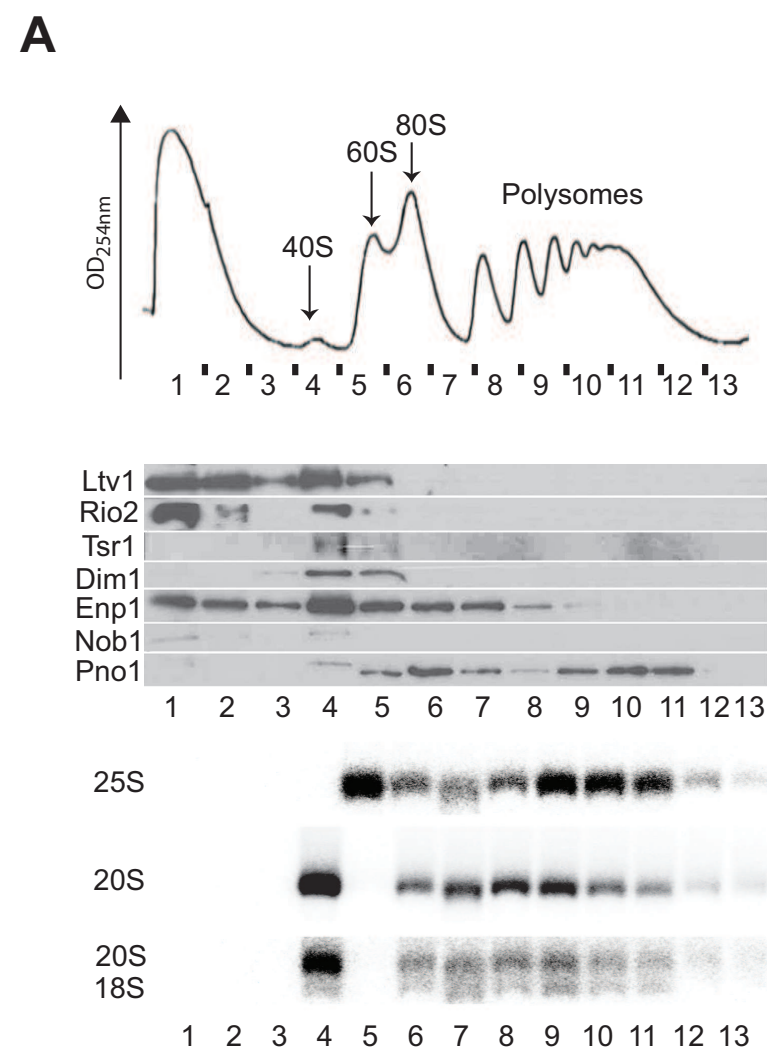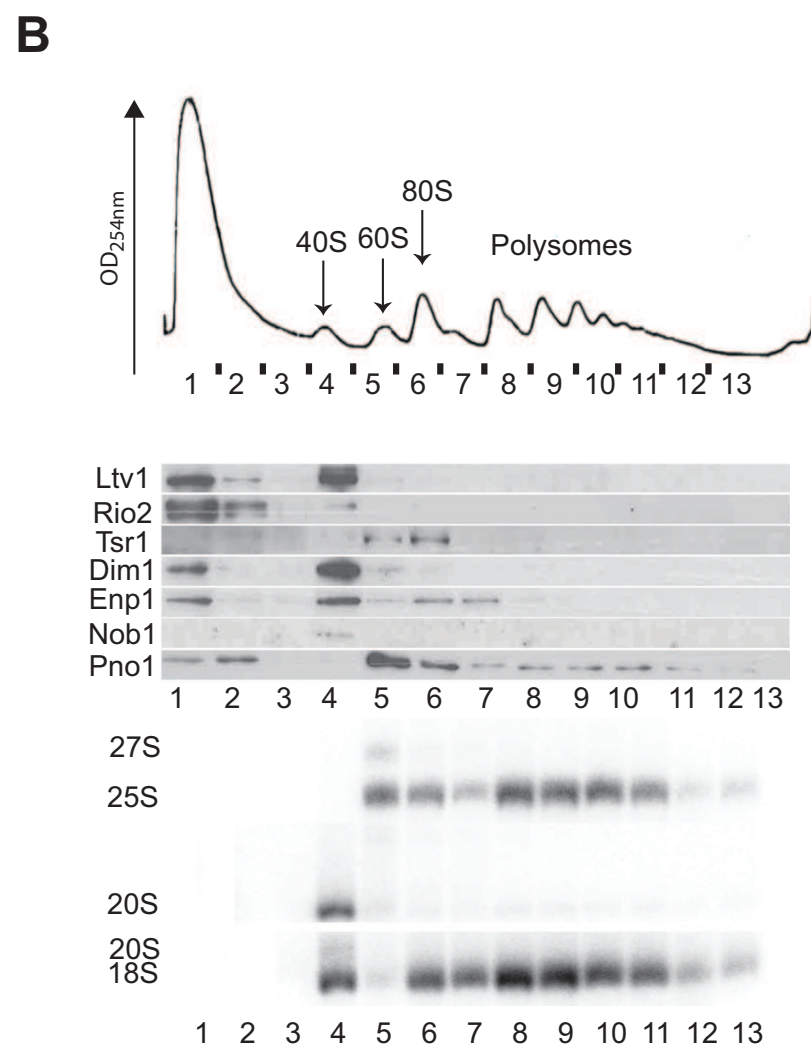

Supplement: NIHMS382257-supplement-02.pdf [file NIHMS382257-supplement-02.pdf]
